# Supplementary material for: Water resources of the Russian rivers and their changes
Source: Copernicus journal article supplement (doi:10.5194/piahs-374-75-2016), 2016-10-17
Supplement: Supplementary file 1 [file piahs-374-75-2016-supplement.zip]

Supplement of Proc. IAHS, 374, 75–77, 2016  
<http://www.proc-iahs.net/374/75/2016/>  
doi:10.5194/piahs-374-75-2016-supplement  
© Author(s) 2016. CC Attribution 3.0 License.

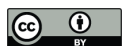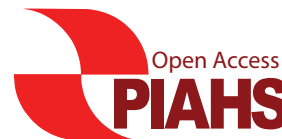

*Supplement of*

## **Water resources of the Russian rivers and their changes**

**Mikhail Georgievsky**

*Correspondence to:* Mikhail Georgievsky (mgeorgievsky@hotmail.com)

- piahs-374-75-2016-supplement-title-page.pdf
- Copy of Water resources of Russian Federation.xlsx

The copyright of individual parts of the supplement might differ from the CC-BY 3.0 licence.
